# Supplementary material for: Pulsed-Xenon Ultraviolet Light Highly Inactivates Human Coronaviruses on Solid Surfaces, Particularly SARS-CoV-2
Source: MDPI journal article supplement (doi:10.3390/ijerph192113780), 2022-10-23
Supplement: s1 [file s1]

**Supplementary Table S1.** Comparison of doses of UVC light emitted by PX-UV source at 1.5 m and conventional UV lamp at 2 m

| Light Strike™ Germ-Zapping™<br>Robot - 1.5 m |                            | TUV PI-L 36W, UV-C – 2 m |                            |
|----------------------------------------------|----------------------------|--------------------------|----------------------------|
| Time (s)                                     | Dose (mJ/cm <sup>2</sup> ) | Time (s)                 | Dose (mJ/cm <sup>2</sup> ) |
| 30                                           | 0.717                      | 30                       | 0.704                      |
| 60                                           | 1.391                      | 60                       | 1.409                      |
| 90                                           | 2.060                      | 90                       | 2.113                      |
| 120                                          | 2.728                      | 120                      | 2.818                      |
| 150                                          | 3.398                      | 150                      | 3.521                      |
| 180                                          | 4.067                      | 180                      | 4.226                      |
| 210                                          | 4.737                      | 210                      | 4.930                      |
| 240                                          | 5.402                      | 240                      | 5.634                      |
| 270                                          | 6.068                      | 270                      | 6.338                      |
| 300                                          | 6.734                      | 300                      | 7.043                      |

**Supplementary Table S2.** Irradiance data measured with StellarNet Blue-Wave Spectroradiometer at 1.5 and 2 m.

| Light Strike™ Germ-Zapping™ Robot | 1.5 m              |                         |
|-----------------------------------|--------------------|-------------------------|
|                                   | μW/cm <sup>2</sup> | U (μW/cm <sup>2</sup> ) |
| UVC                               | 22.23              | 0.87                    |
| UVB                               | 15.52              | 0.60                    |
| UVA                               | 49.50              | 1.20                    |
| Total UV light                    | 87.10              | 1.60                    |
| TUV PI-L 36W, UV-C                | 2.0 m              |                         |
|                                   | μW/cm <sup>2</sup> | U (μW/cm <sup>2</sup> ) |
| UVC                               | 23.48              | 4.35                    |

U, measurement uncertainty.

**Supplementary Table S3.** Dose data of Light Strike™ Germ-Zapping™ Robot calculated at 1.5 m from 30 to 300 seconds of exposure

|          | Dose (mJ/cm <sup>2</sup> ) - 1.5 m |       |        |          |
|----------|------------------------------------|-------|--------|----------|
| Time (s) | UVC                                | UVB   | UVA    | TOTAL UV |
| 30       | 0.717                              | 0.501 | 1.597  | 2.810    |
| 60       | 1.391                              | 0.971 | 3.096  | 5.448    |
| 90       | 2.060                              | 1.438 | 4.586  | 8.070    |
| 120      | 2.728                              | 1.904 | 6.072  | 10.685   |
| 150      | 3.398                              | 2.372 | 7.565  | 13.312   |
| 180      | 4.067                              | 2.839 | 9.055  | 15.933   |
| 210      | 4.737                              | 3.307 | 10.545 | 18.555   |
| 240      | 5.402                              | 3.771 | 12.027 | 21.162   |
| 270      | 6.068                              | 4.236 | 13.509 | 23.770   |
| 300      | 6.734                              | 4.701 | 14.993 | 26.381   |

**Supplementary Table S4.** Dose data of TUV PI-L 36W, UV-C calculated at 2 m from 30 to 300 seconds of exposure

| Time (s) | Dose (mJ/cm <sup>2</sup> ) – 2 m |
|----------|----------------------------------|
| 30       | 0.704                            |
| 60       | 1.409                            |
| 90       | 2.113                            |
| 120      | 2.818                            |
| 150      | 3.521                            |
| 180      | 4.226                            |
| 210      | 4.930                            |
| 240      | 5.634                            |
| 270      | 6.338                            |
| 300      | 7.043                            |
